# Supplementary material
Source: publisher figshare collection journal article supplement (https://tandf.figshare.com/ndownloader/files/17132243)
Supplement: Supplementary file 1 [file 17132243]

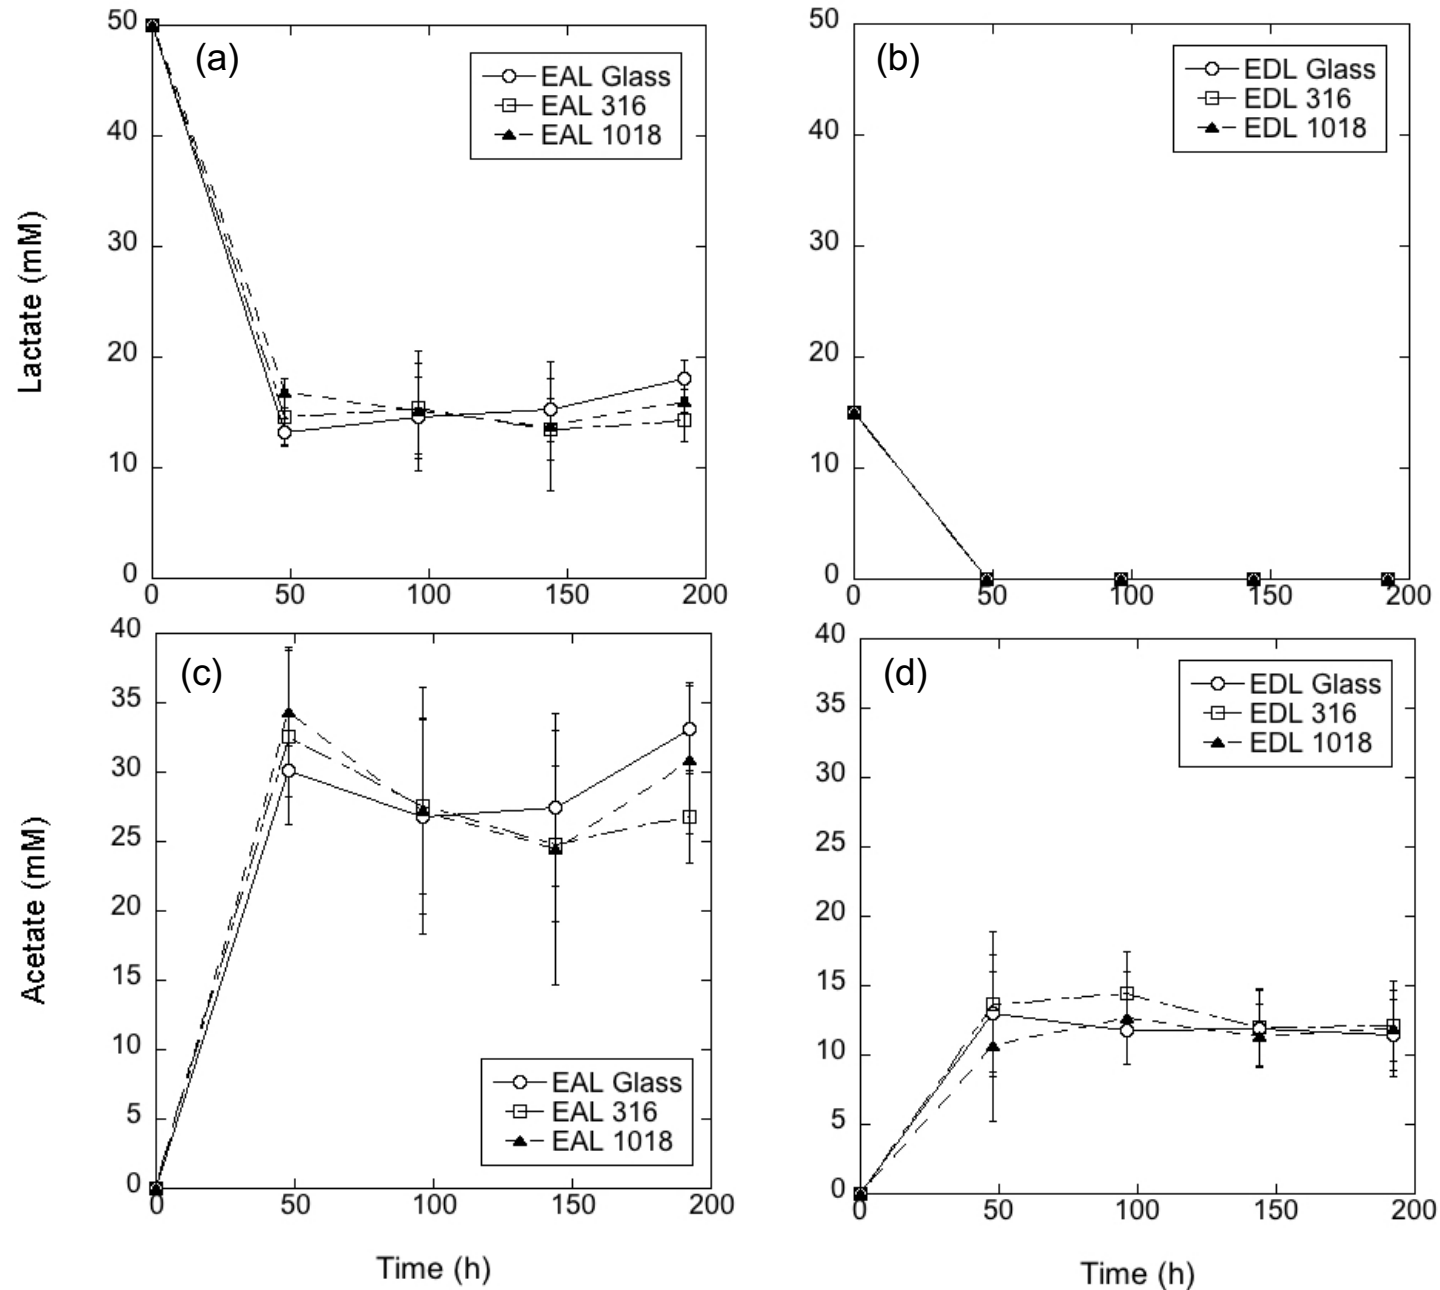

**Figure S1.** (a) Lactate levels are shown under EAL condition on glass, 316 stainless steel, and 1018 carbon steel surfaces; as well as (b) Lactate levels under EDL condition on all three surface types. (c) Acetate levels under EAL condition on all 3 surfaces are shown with (d) Acetate levels under EDL condition on all three surface types.

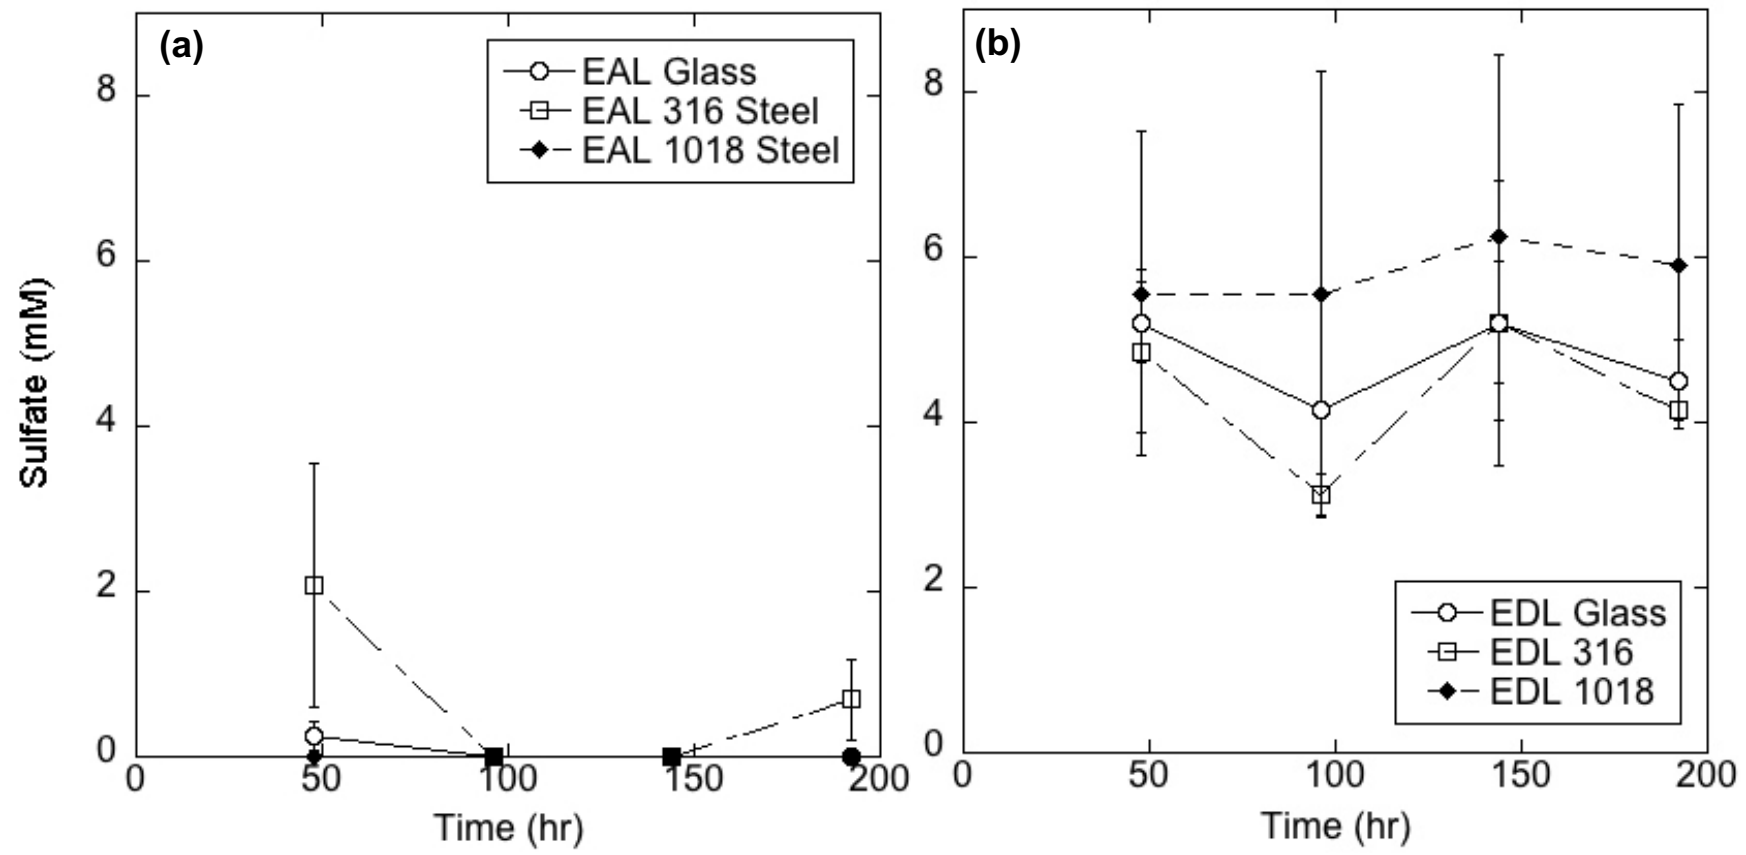

**Figure S2.** (a) Planktonic sulfate concentrations under EAL conditions. (b) Planktonic sulfate concentrations under EDL conditions.

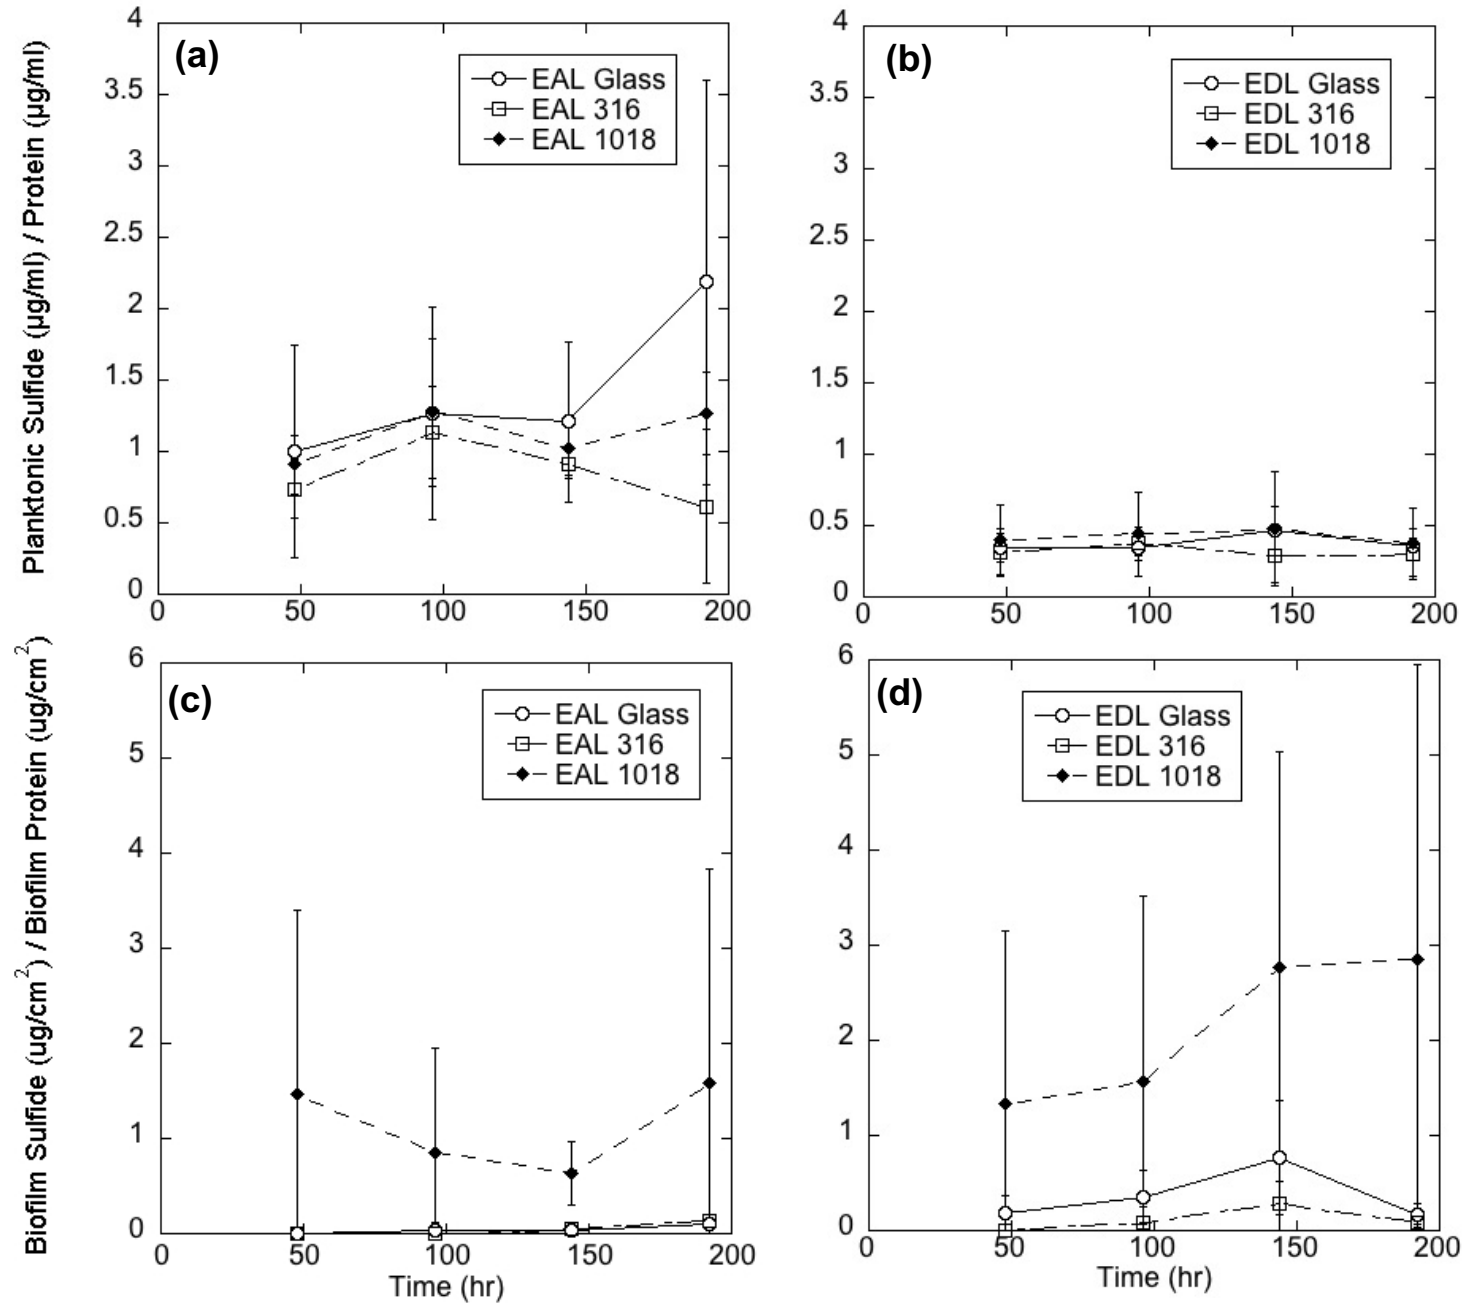

**Figure S3.** Sulfide was measured and normalized to protein levels. Biofilm sulfide levels were also normalized to surface area. (a) Planktonic sulfide concentrations under EAL conditions. (b) Planktonic sulfide levels under EDL conditions. (c) Biofilm sulfide levels under EAL conditions. (d) Biofilm sulfide levels under EDL conditions.
